# Supplementary material for: SIRT1 Promotes Cisplatin Resistance in Bladder Cancer via Beclin1 Deacetylation-Mediated Autophagy
Source: MDPI journal article supplement (doi:10.3390/cancers16010125), 2023-12-26

**Figure S1.** The original western blot figures.

Uncropped blots for Figure 2

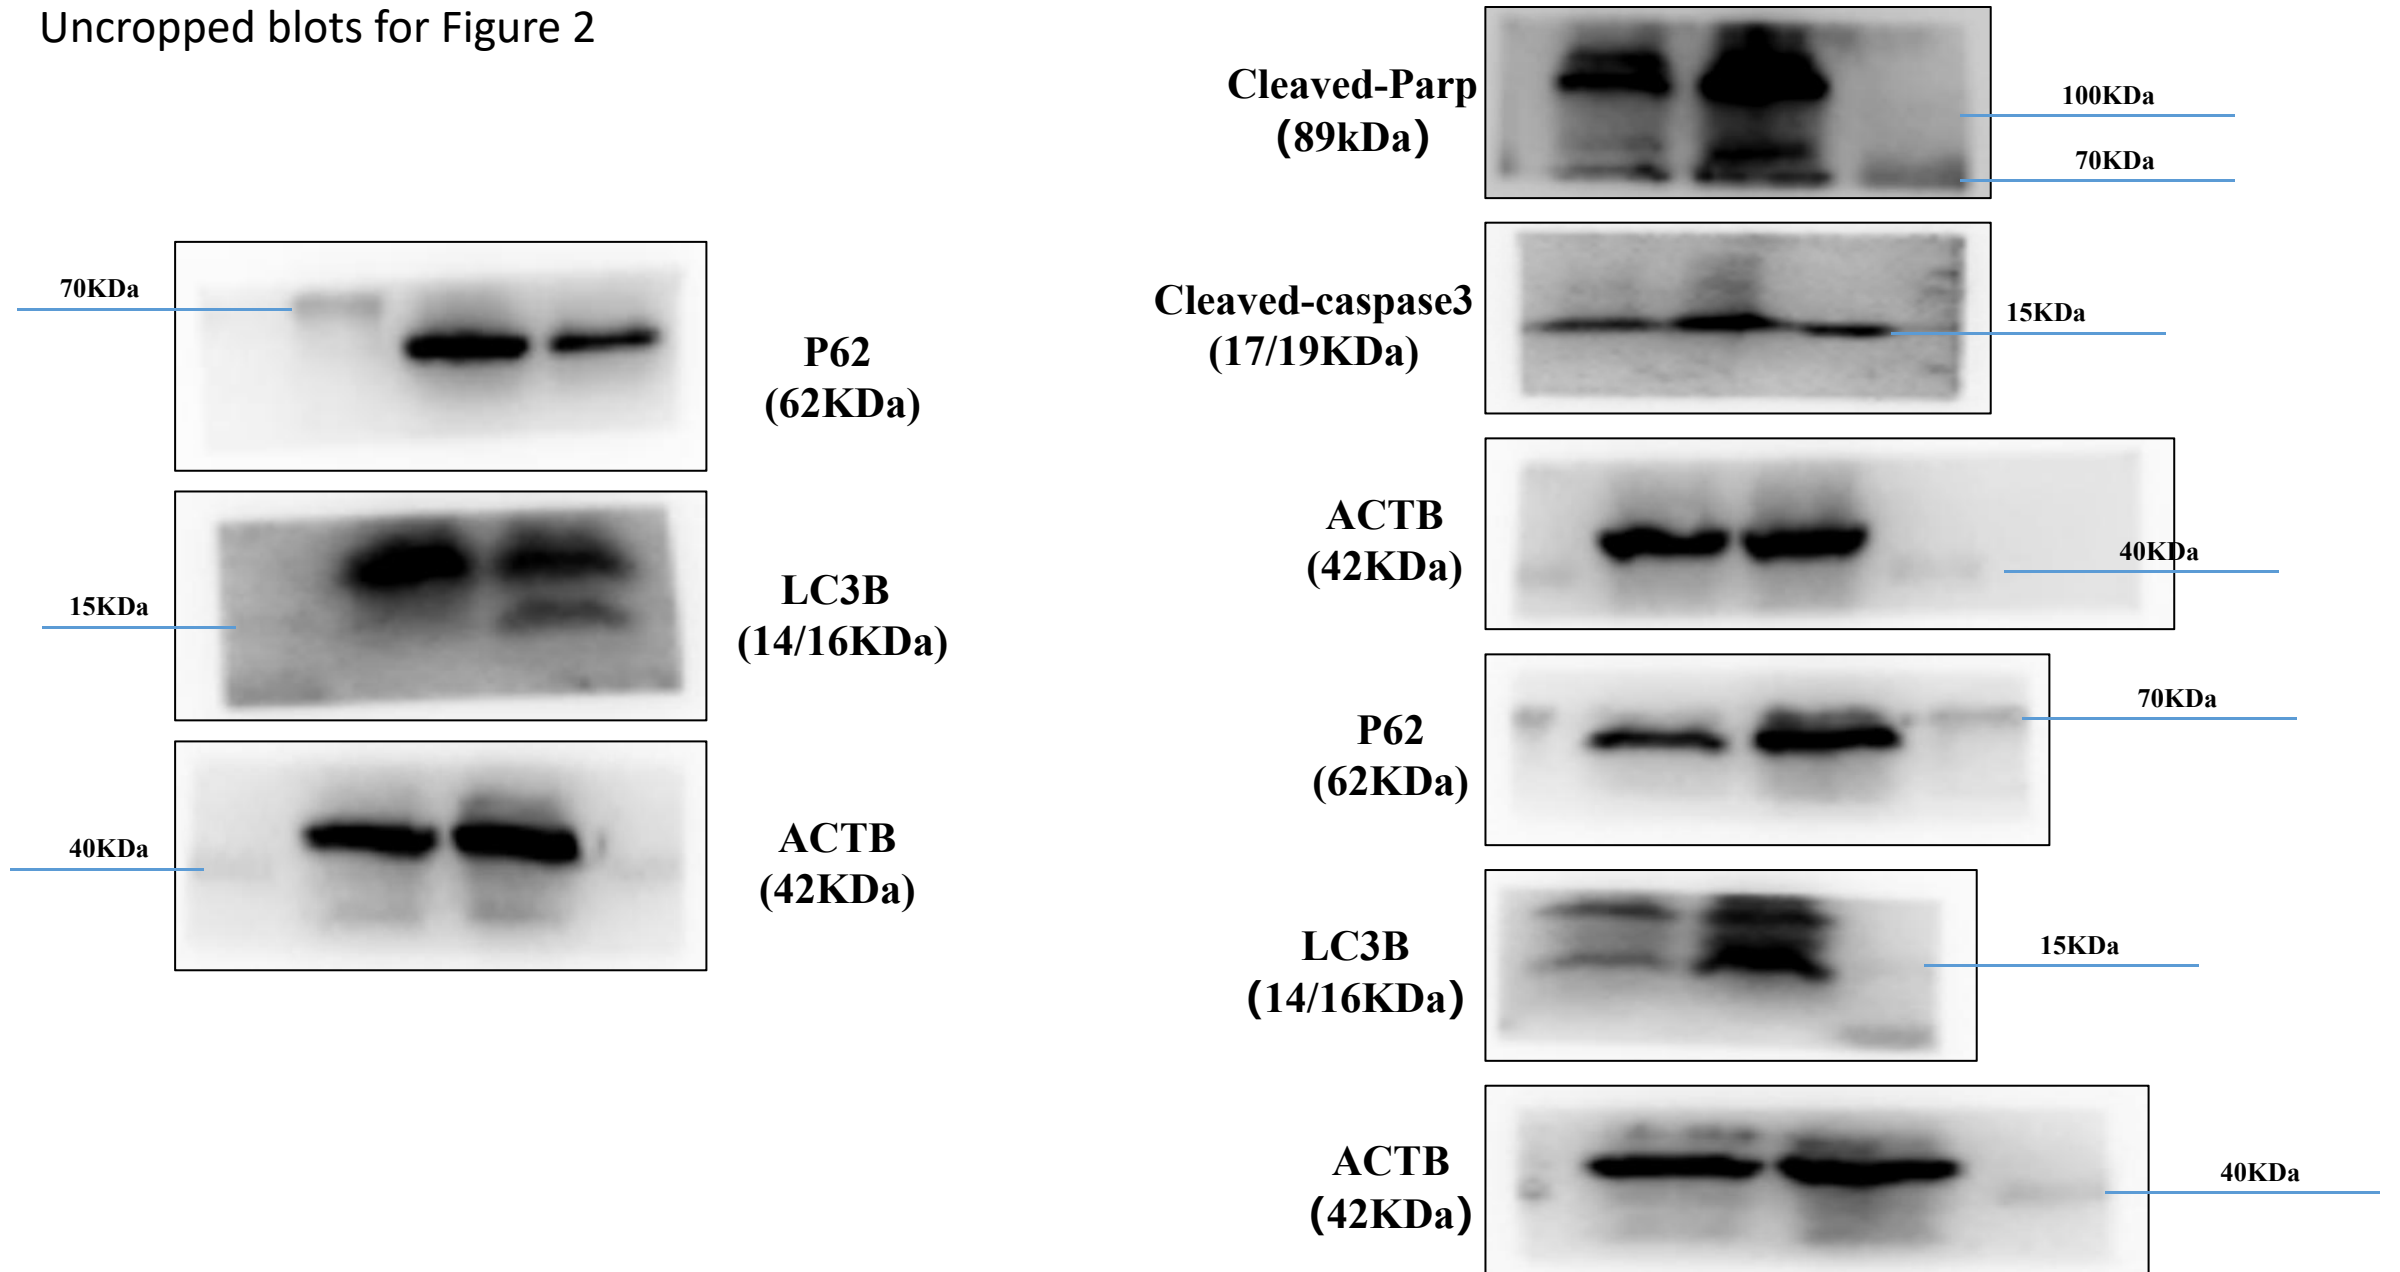

# Uncropped blots for Figure 3

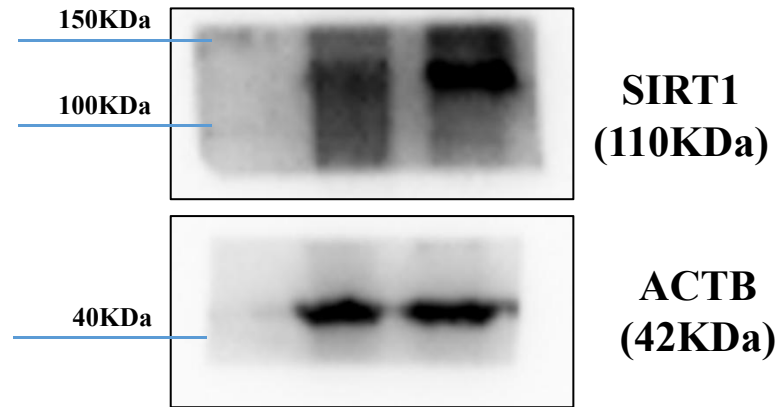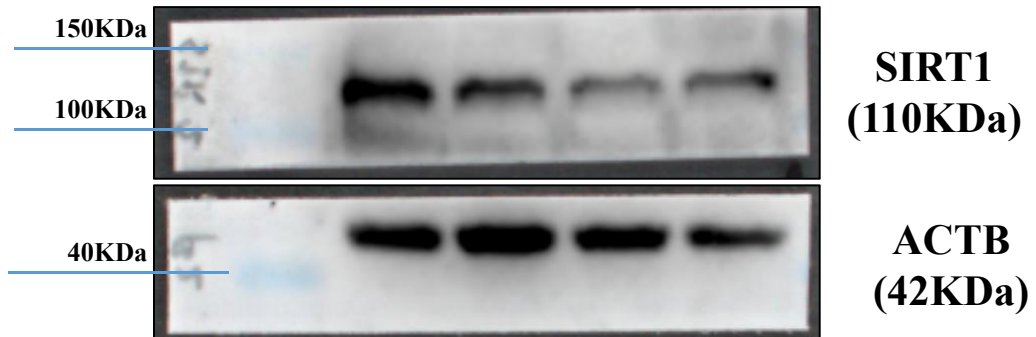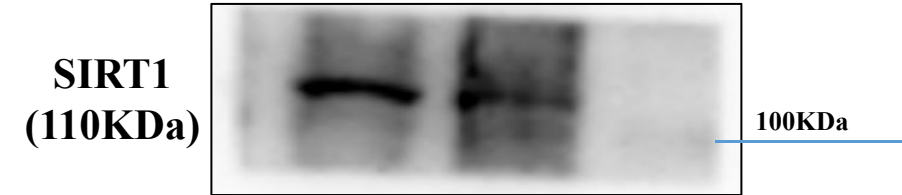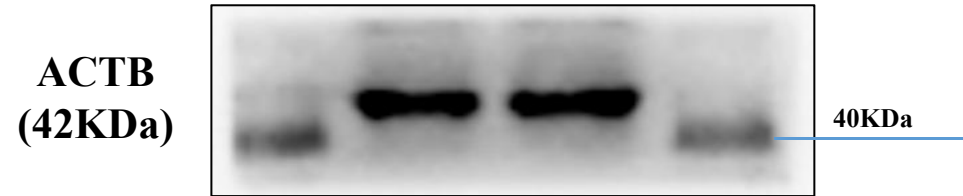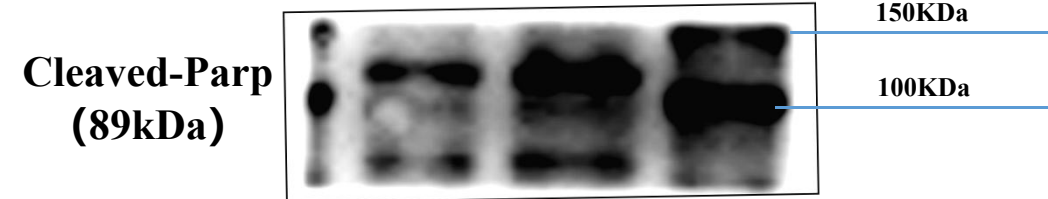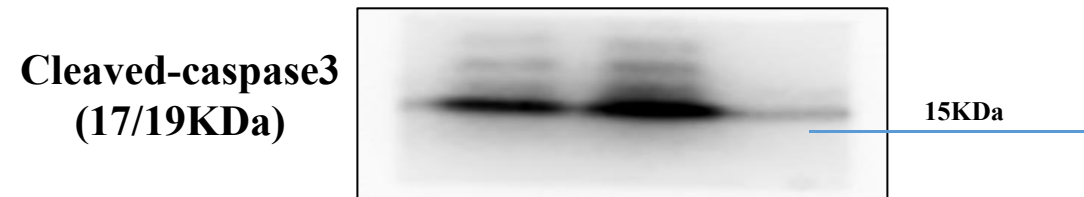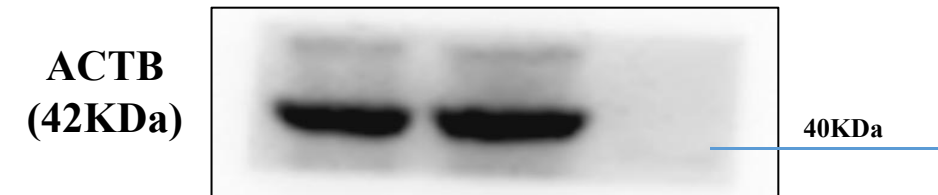

Uncropped blots for Figure 4

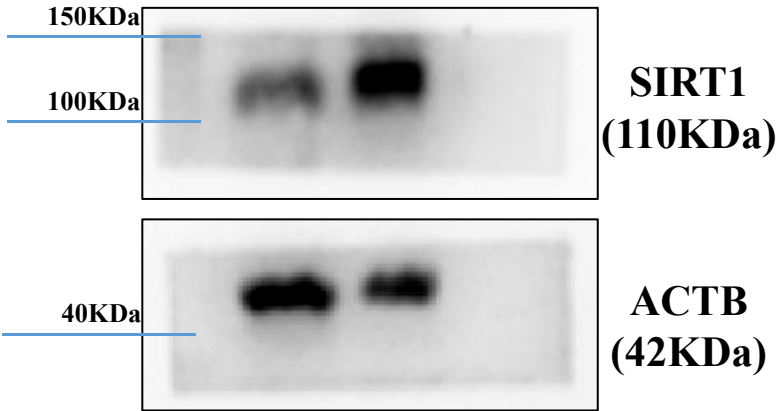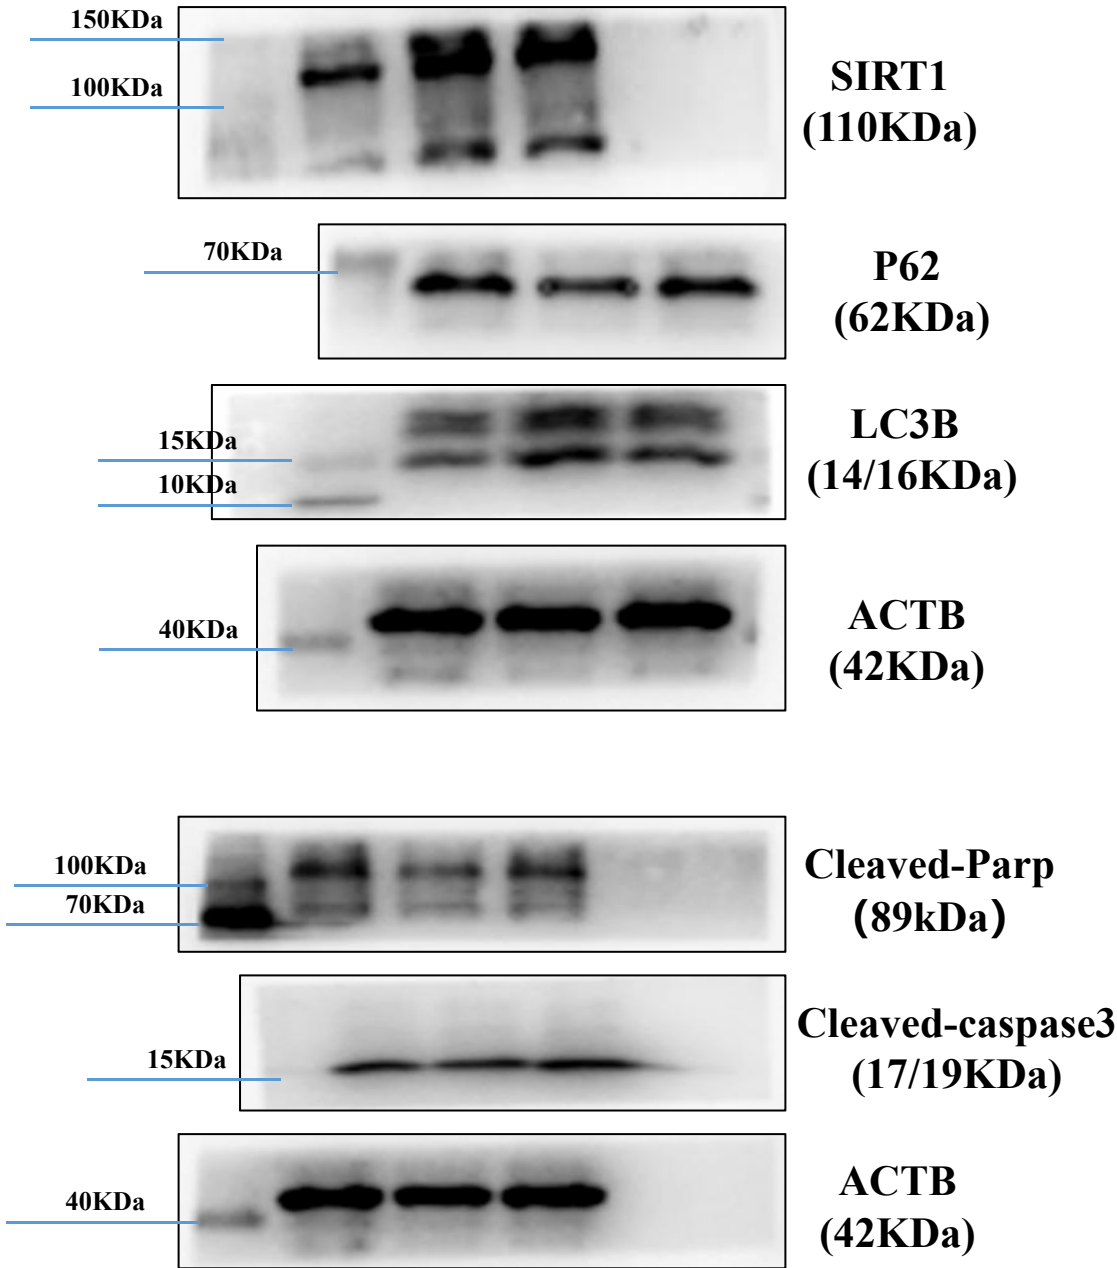

Uncropped blots for Figure 5

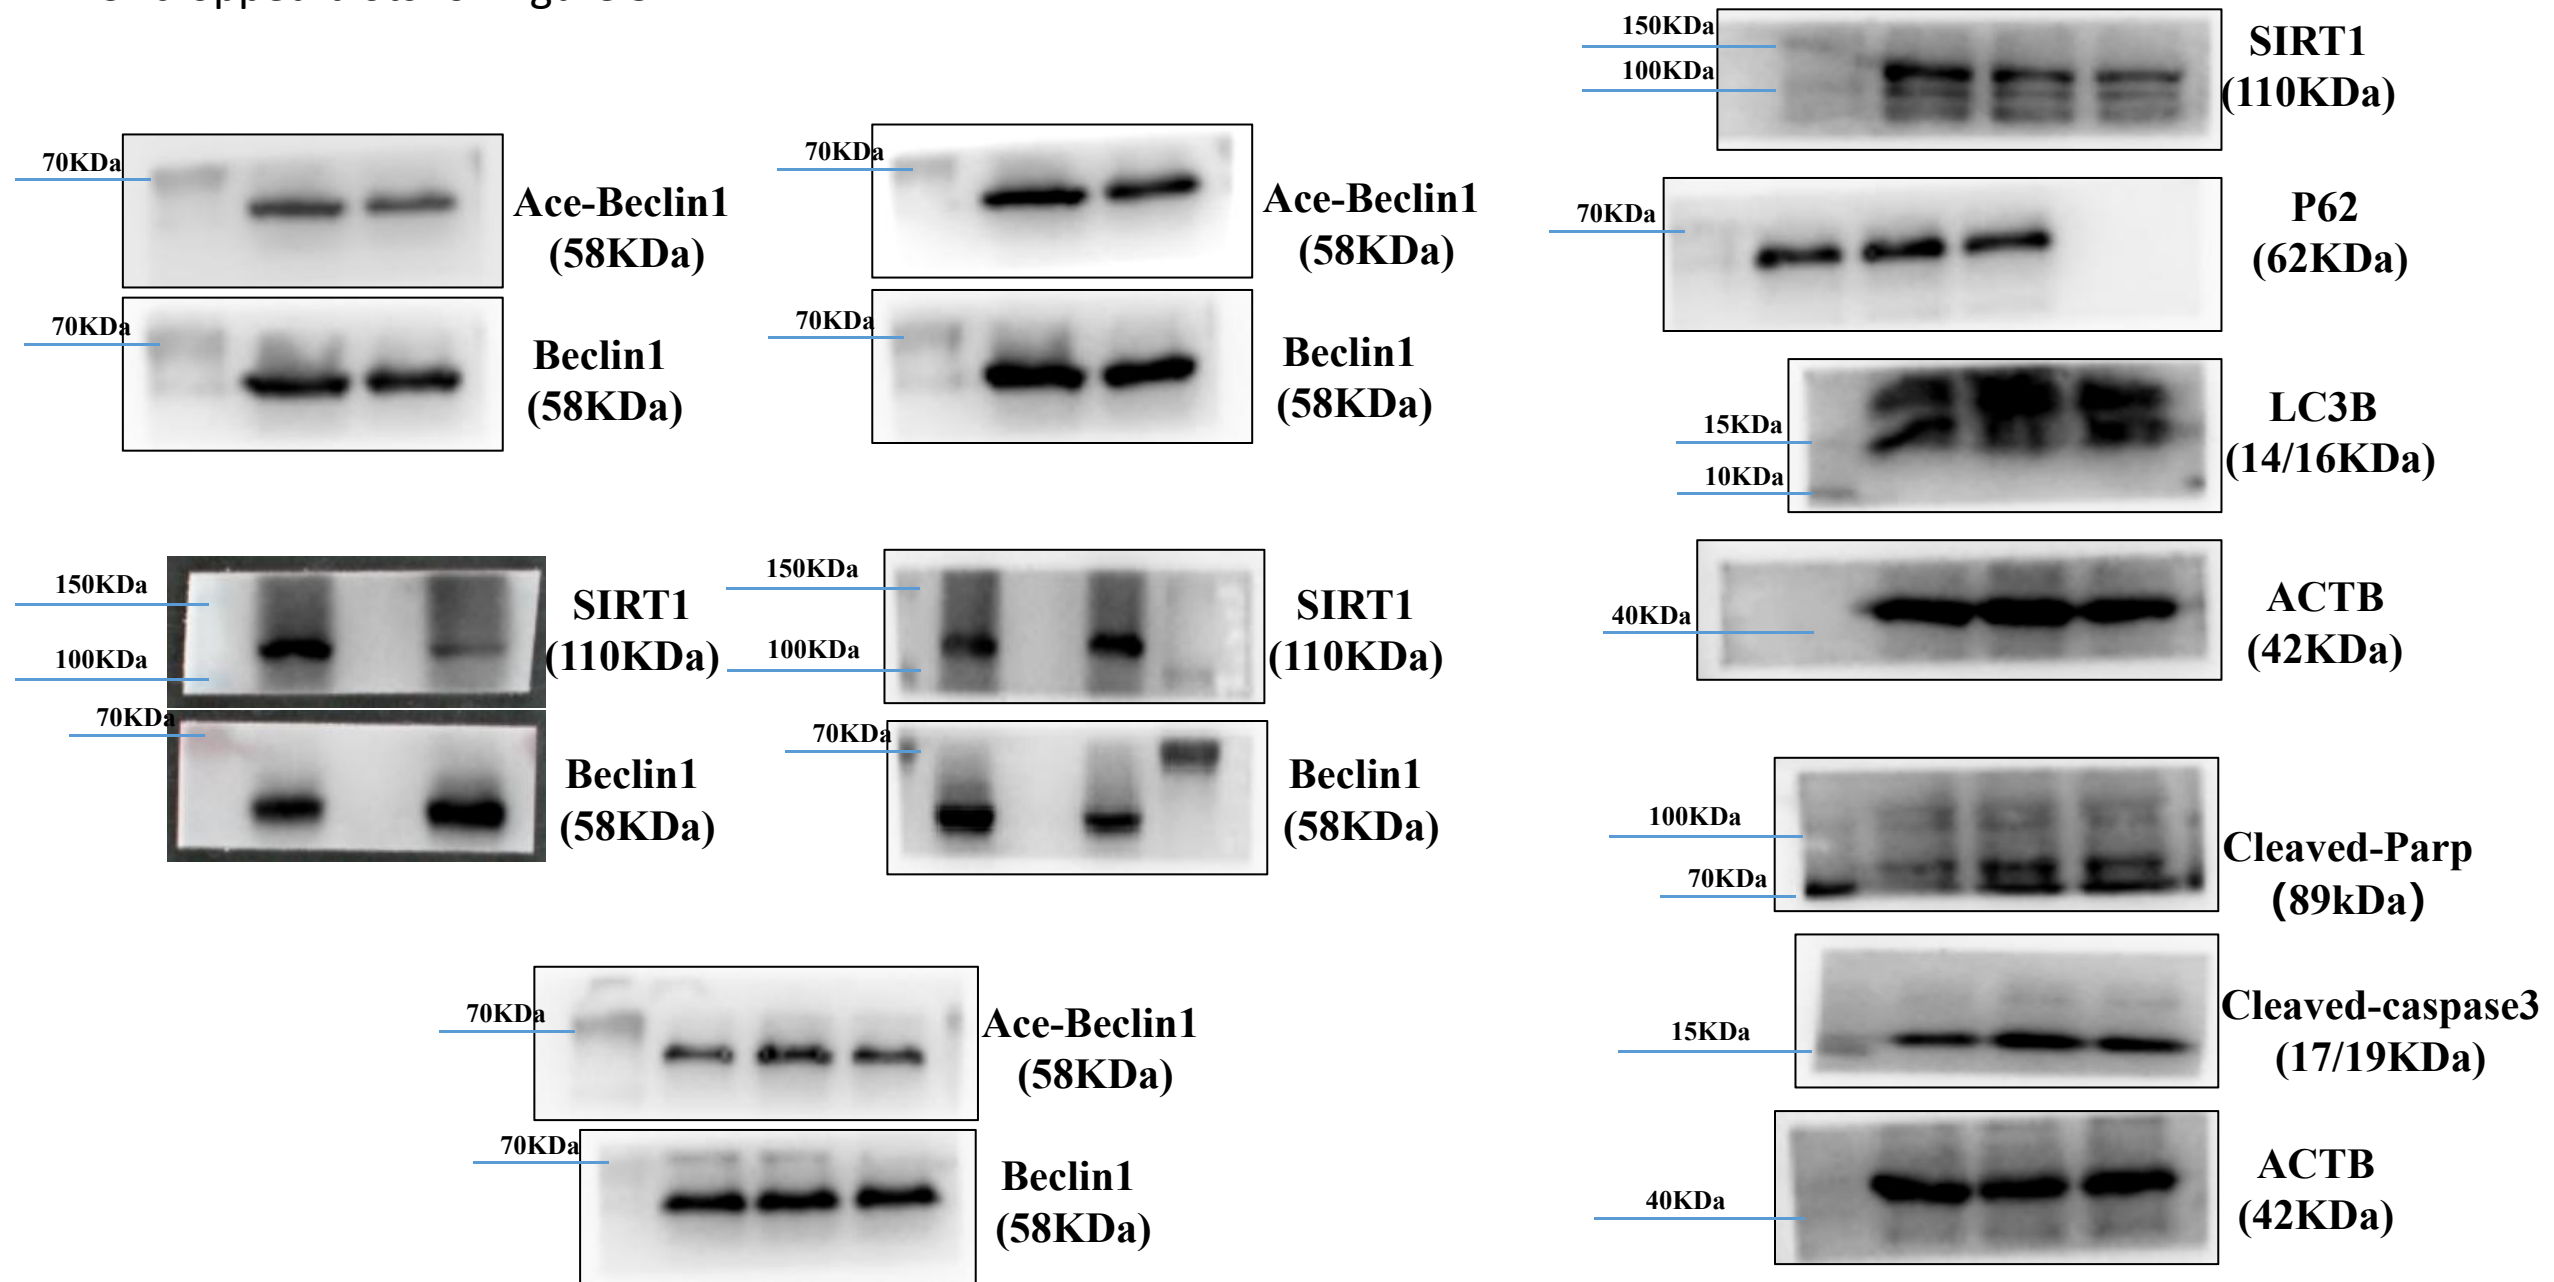

Supplement: s1 [file s1]
